# Supplementary material for: UiO-66-NH2 based fluorescent sensing for detection of tetracyclines in milk
Source: Royal Society of Chemistry journal article supplement (doi:10.1039/d2ra04023a), 2022-01-01
Supplement: d2ra04023a1.pdf [file d2ra04023a1.pdf]

## Electronic Supplementary Information

### **UiO-66-NH<sub>2</sub> based fluorescent sensing for detection of tetracyclines in milk**

Xiaohui Wang,<sup>\*a</sup> Xufeng Wang<sup>a</sup>

<sup>a</sup> State Key Laboratory of Food Nutrition and Safety, Tianjin University  
of Science and Technology, Tianjin 300457, China.

\* Correspondence: [xhw2022tjin@163.com](mailto:xhw2022tjin@163.com)

## Supplementary Figures and Tables

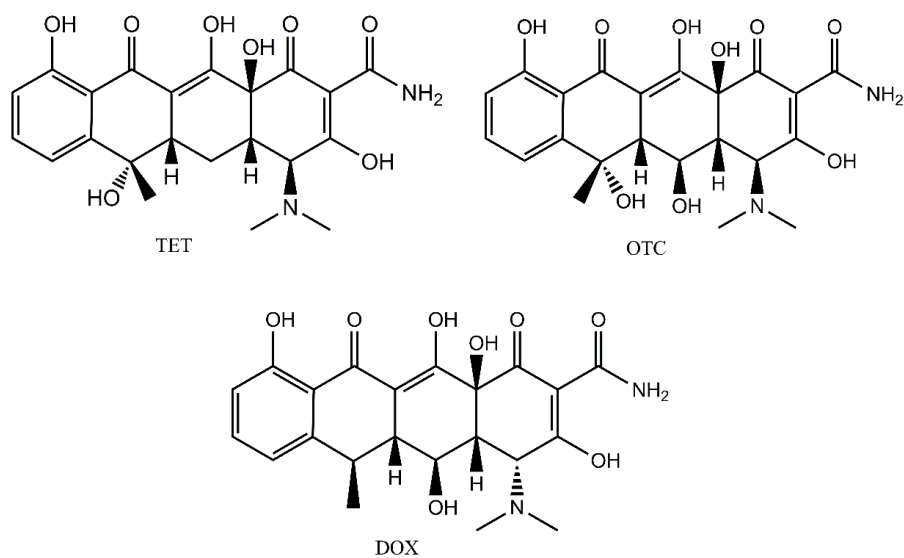

Fig.S1. Chemical structural formulas of TET, OTC, and DOX.

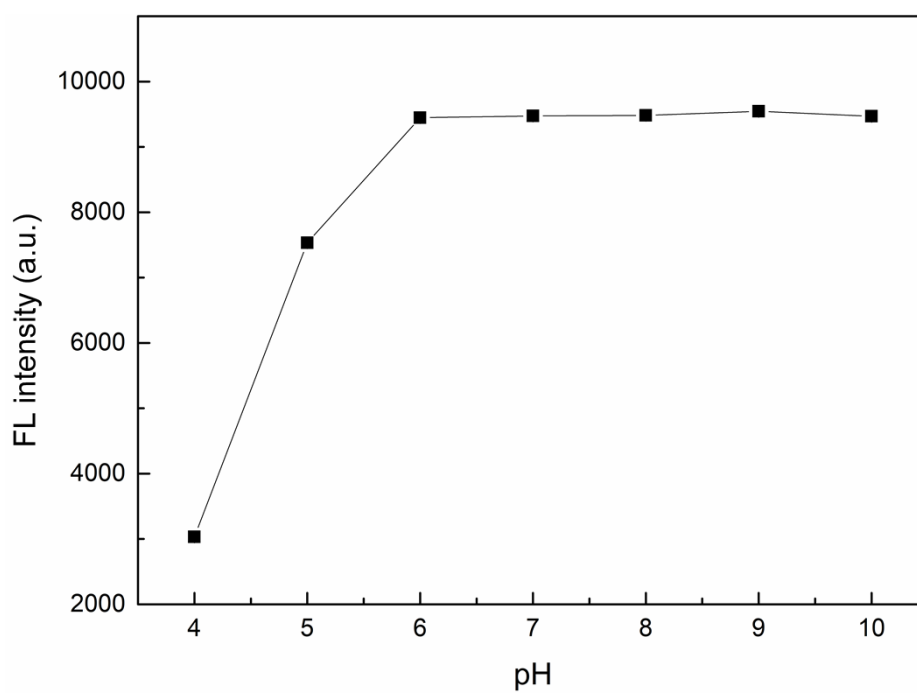

Fig.S2. The effect of pH on the fluorescence intensity of UiO-66-NH<sub>2</sub>.

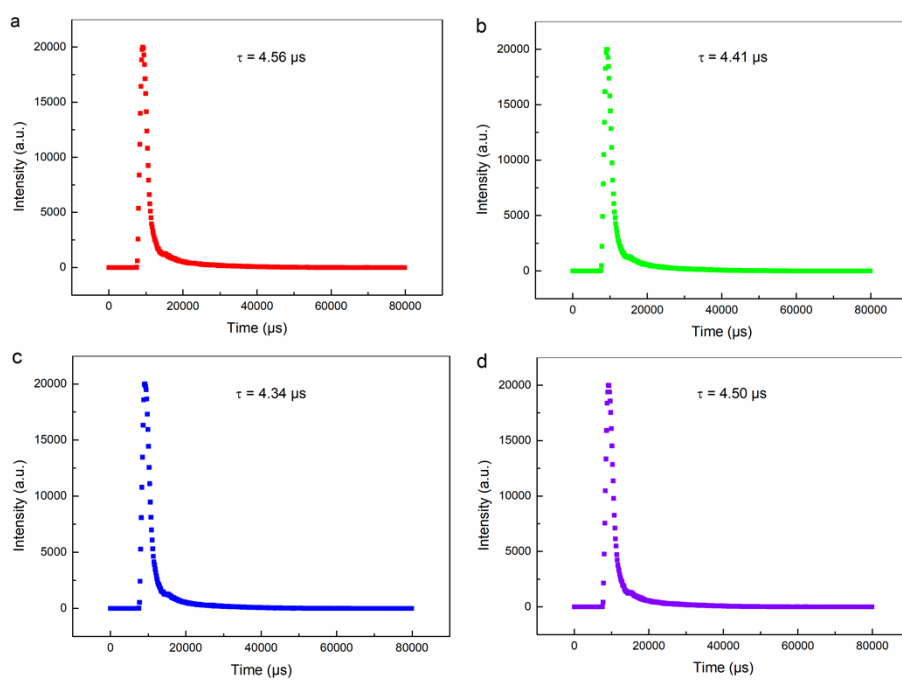

**Fig. S3.** Fluorescence emission decay curves of (a) UiO-66-NH<sub>2</sub> alone, (b) UiO-66-NH<sub>2</sub> +TET, (c)

UiO-66-NH<sub>2</sub> +OTC, and (d) UiO-66-NH<sub>2</sub> +DOX.

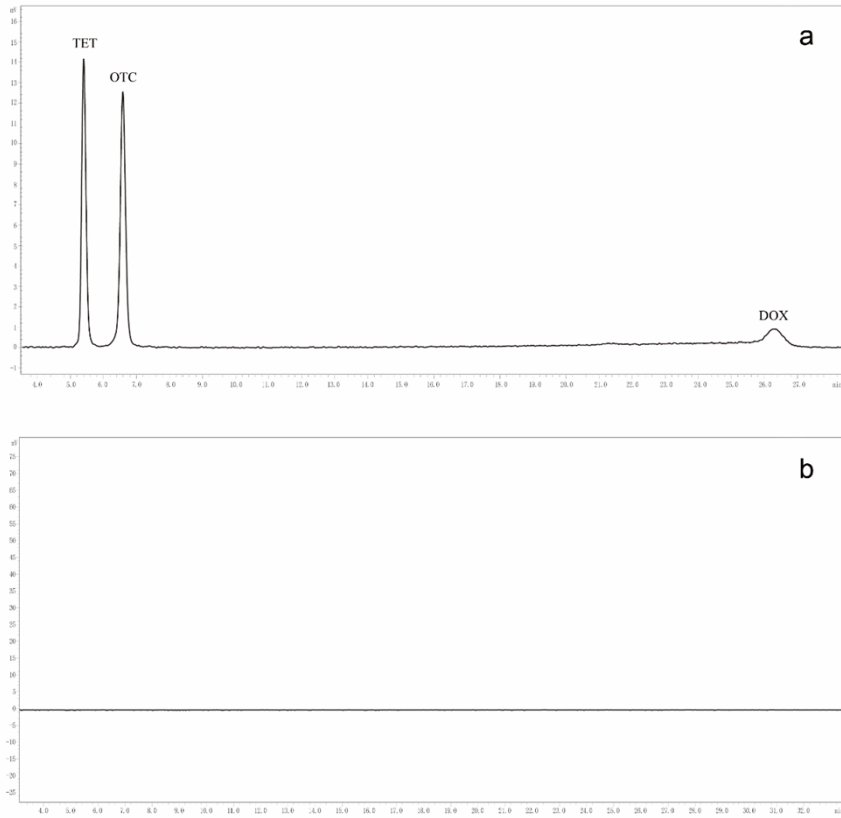

**Fig.S4.** Representative chromatogram of standard samples containing TET, OTC and DOX (a);

Chromatogram of milk sample (b).

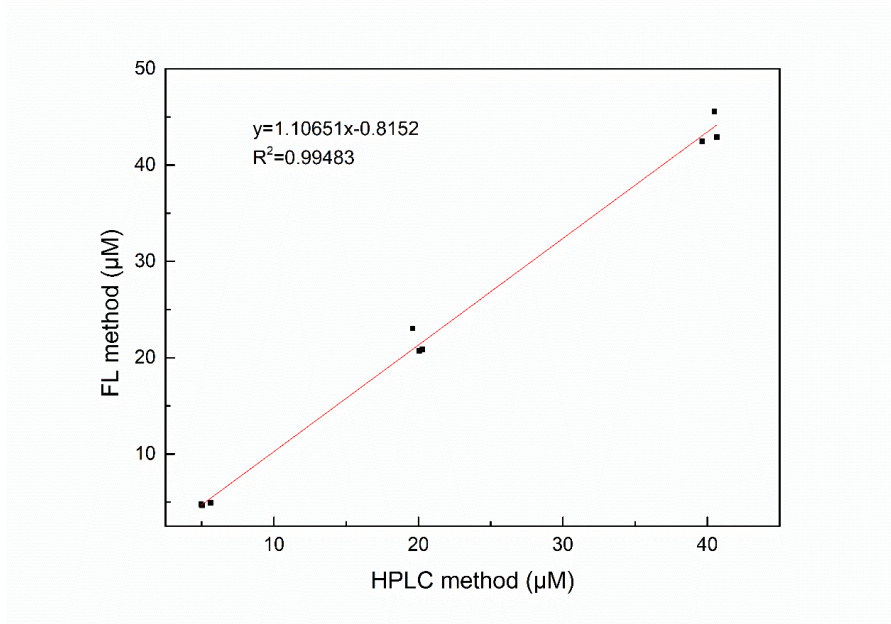

**Fig.S5.** The linear relationship between HPLC method and fluorescence method.

**Table S1** The intra- and inter-day precisions of the assay (n = 6)

| TCs | Spiked<br>( $\mu\text{M}$ ) | Intra-day (n = 6) <sup>a</sup>                 |                   |  | Inter-day (n = 6) <sup>b</sup>                 |                   |  |
|-----|-----------------------------|------------------------------------------------|-------------------|--|------------------------------------------------|-------------------|--|
|     |                             | Detected<br>Concentration<br>( $\mu\text{M}$ ) | RSD<br>(%, n = 6) |  | Detected<br>Concentration<br>( $\mu\text{M}$ ) | RSD<br>(%, n = 6) |  |
| TET | 5                           | 4.822 $\pm$ 0.089                              | 1.85              |  | 4.961 $\pm$ 0.123                              | 2.48              |  |
|     | 20                          | 20.748 $\pm$ 0.244                             | 1.17              |  | 20.400 $\pm$ 0.298                             | 1.46              |  |
|     | 40                          | 40.091 $\pm$ 0.379                             | 0.95              |  | 39.932 $\pm$ 0.361                             | 0.90              |  |
| OTC | 5                           | 4.996 $\pm$ 0.170                              | 3.40              |  | 4.911 $\pm$ 0.162                              | 3.29              |  |
|     | 20                          | 20.082 $\pm$ 0.166                             | 0.83              |  | 20.003 $\pm$ 0.204                             | 1.02              |  |
|     | 40                          | 39.625 $\pm$ 0.415                             | 1.05              |  | 39.992 $\pm$ 0.459                             | 1.15              |  |
| DOX | 5                           | 4.926 $\pm$ 0.111                              | 2.24              |  | 4.946 $\pm$ 0.119                              | 2.41              |  |
|     | 20                          | 19.970 $\pm$ 0.125                             | 0.63              |  | 19.924 $\pm$ 0.149                             | 0.75              |  |
|     | 40                          | 40.113 $\pm$ 0.724                             | 1.80              |  | 40.442 $\pm$ 0.906                             | 2.24              |  |

<sup>a</sup> Intra-day precision: the average value of six repeated tests in the same day

<sup>b</sup> Inter-day precision: the average value of the same experiment in six days

**Table S2** Detection of TCs in milk samples by UiO-66-NH<sub>2</sub> sensor and HPLC

| TCs | Spiked<br>( $\mu\text{M}$ ) | UiO-66-NH <sub>2</sub> |          |          | HPLC               |          |          |
|-----|-----------------------------|------------------------|----------|----------|--------------------|----------|----------|
|     |                             | Found                  | Recovery | RSD      | Found              | Recovery | RSD      |
|     |                             | ( $\mu\text{M}$ )      | (%)      | (%,n= 3) | ( $\mu\text{M}$ )  | (%)      | (%,n= 3) |
| TET | 0                           | 0                      | -        | -        | 0                  | -        | -        |
|     | 5                           | 4.932 $\pm$ 0.096      | 98.63    | 1.95     | 5.623 $\pm$ 0.001  | 112.46   | 0.03     |
|     | 20                          | 20.859 $\pm$ 0.298     | 104.29   | 1.43     | 20.277 $\pm$ 0.014 | 101.39   | 0.07     |
|     | 40                          | 45.551 $\pm$ 0.238     | 113.88   | 0.52     | 40.483 $\pm$ 0.018 | 101.21   | 0.04     |
| OTC | 0                           | 0                      | -        | -        | 0                  | -        | -        |
|     | 5                           | 4.663 $\pm$ 0.111      | 93.26    | 2.38     | 5.042 $\pm$ 0.006  | 100.84   | 0.12     |
|     | 20                          | 20.718 $\pm$ 0.579     | 103.59   | 2.79     | 20.051 $\pm$ 0.042 | 100.25   | 0.21     |
|     | 40                          | 42.911 $\pm$ 0.216     | 107.28   | 0.50     | 40.655 $\pm$ 0.040 | 101.64   | 0.10     |
| DOX | 0                           | 0                      | -        | -        | 0                  | -        | -        |
|     | 5                           | 4.786 $\pm$ 0.079      | 95.71    | 1.65     | 4.960 $\pm$ 0.021  | 99.21    | 0.42     |
|     | 20                          | 23.033 $\pm$ 0.672     | 115.17   | 2.92     | 19.597 $\pm$ 0.036 | 97.99    | 0.19     |
|     | 40                          | 42.448 $\pm$ 0.403     | 106.12   | 0.95     | 39.638 $\pm$ 0.020 | 99.09    | 0.05     |
